# Supplementary material
Source: MDPI journal article supplement (https://www.mdpi.com/2076-3417/11/10/4543)
Supplement: s1 [file s1]

# Supplementary Materials

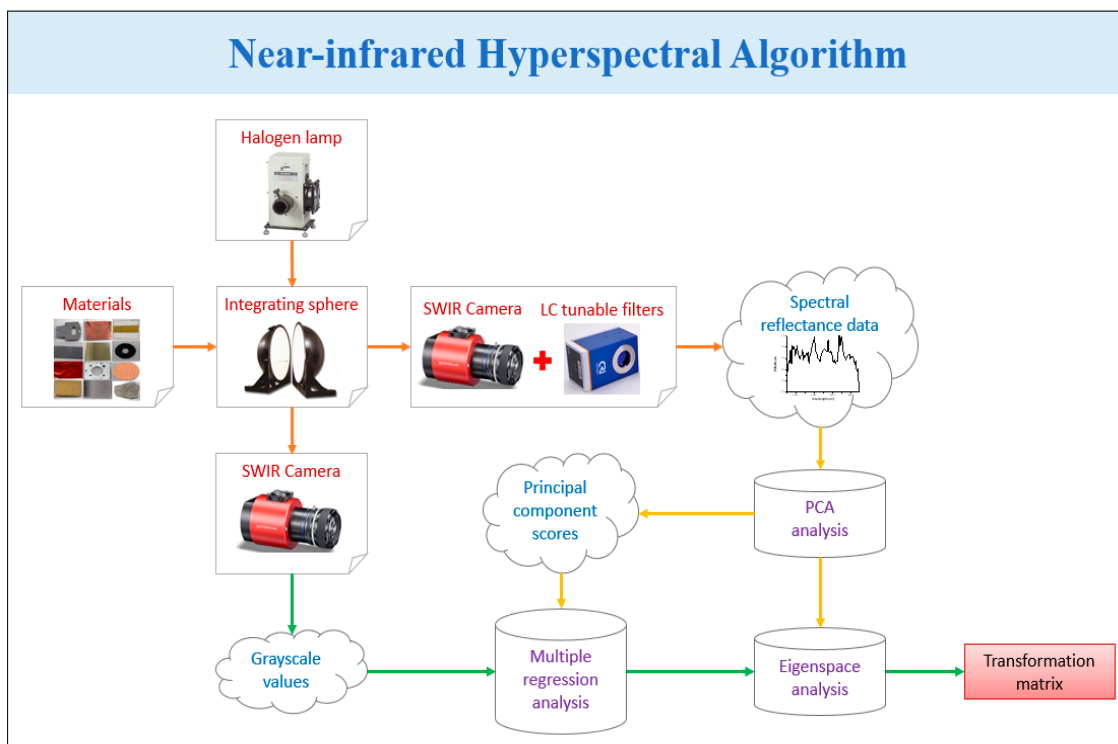

Figure S1. NIR Hyperspectral Technology.

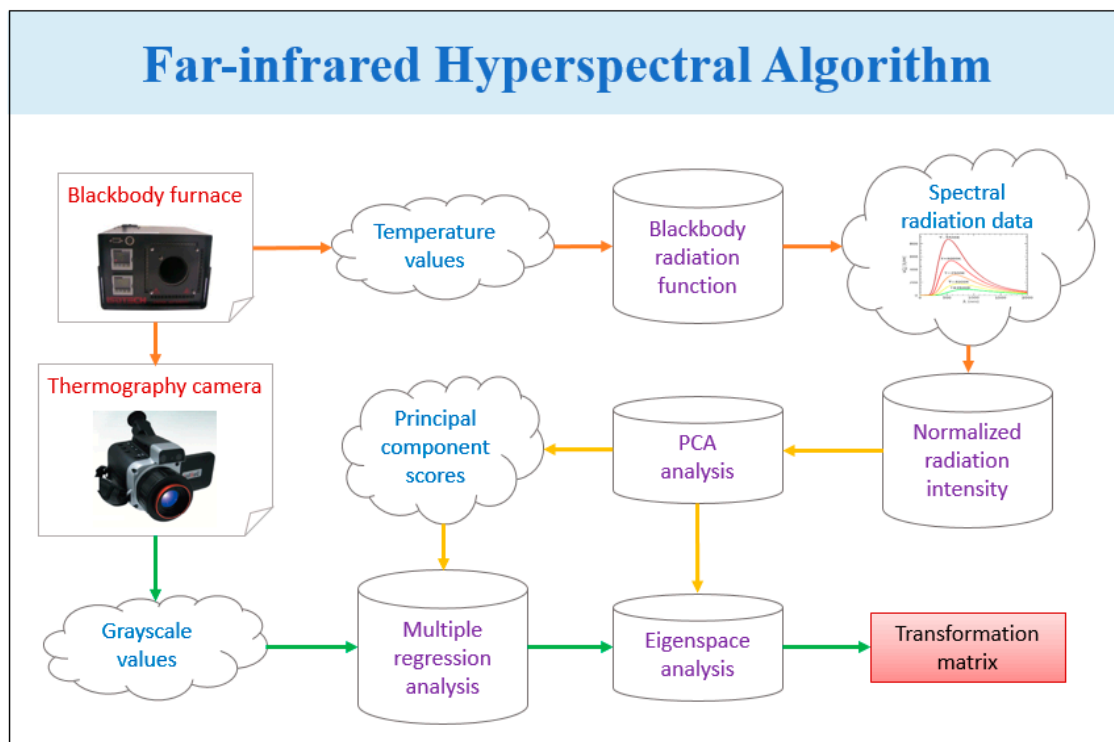

Figure S2. FIR Hyperspectral Technology.

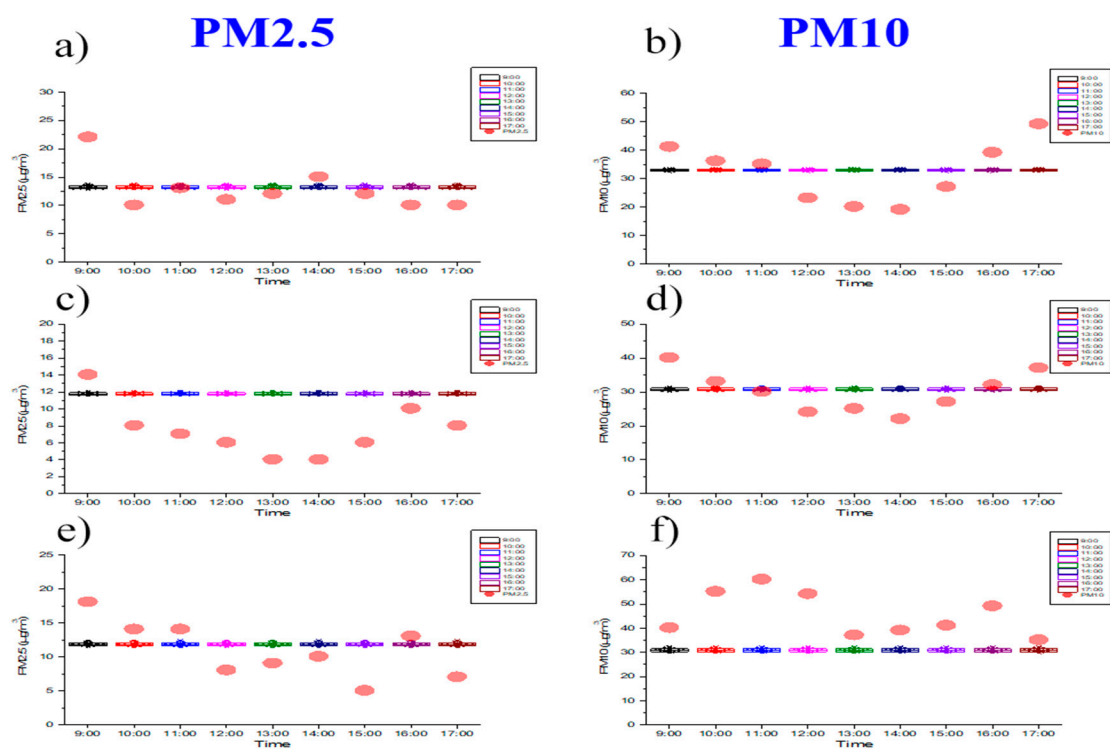

Figure S3. Estimated results of PM<sub>2.5</sub> and PM<sub>10</sub> in the FIR.

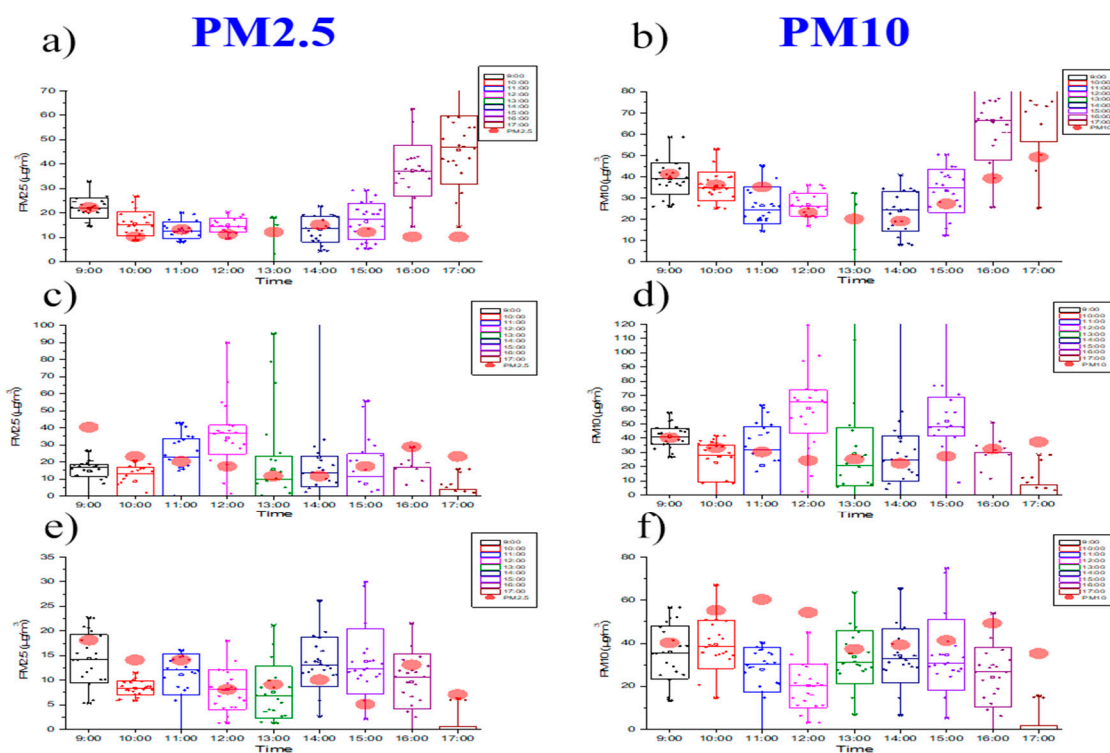

Figure S4. Estimated results of PM<sub>2.5</sub> and PM<sub>10</sub> in the NIR.

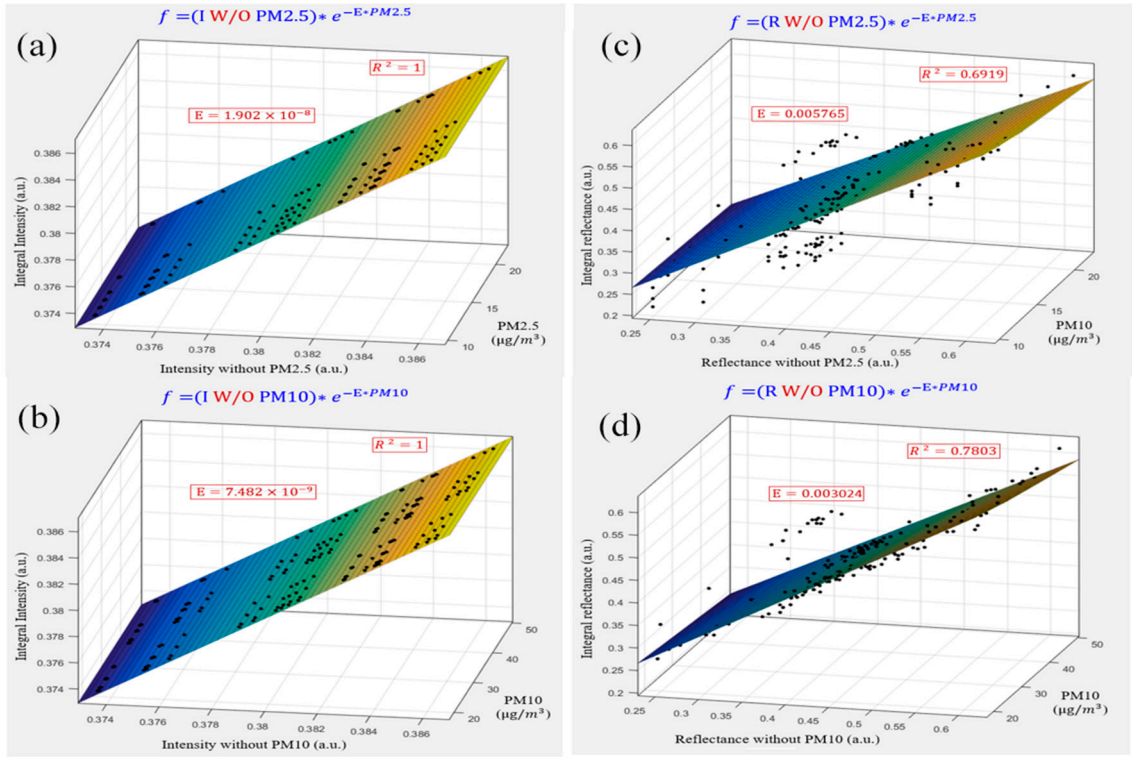

Figure S5. Detailed description of the FIR-HSI.
